# Supplementary material for: The use of electromyography and kinematic measurements of the lumbar spine during ergonomic intervention among workers of the production line of a foundry
Source: PeerJ. 2022 Mar 18;10:e13072. doi: 10.7717/peerj.13072 (PMC8935989; doi:10.7717/peerj.13072)
Supplement: Supplemental Information 1 — This collection was used to perform statistical calculations. [file peerj-10-13072-s001.xlsx]

## Sheet: EMG activity I before
lp	LT_ES_f1_before_1	LT_ES_f1_before_2	LT_ES_f1_before_3	RT_ES_f1_before_1	RT_ES_f1_before_2	RT_ES_f1_before_3	LT_LD_f1_before_1	LT_LD_f1_before_2	LT_LD_f1_before_3	RT_LD_f1_before_1	RT_LD_f1_before_2	RT_LD_f1_before_3	LT_LT_f1_before_1	LT_LT_f1_before_2	LT_LT_f1_before_3	RT_LT_f1_before_1	RT_LT_f1_before_2	RT_LT_f1_before_3	LT_MD_f1_before_1	LT_MD_f1_before_2	LT_MD_f1_before_3	RT_MD_f1_before_1	RT_MD_f1_before_2	RT_MD_f1_before_3	LT_PM_f1_before_1	LT_PM_f1_before_2	LT_PM_f1_before_3	RT_PM_f1_before_1	RT_PM_f1_before_2	RT_PM_f1_before_3	LT_ES_f2_before_1	LT_ES_f2_before_2	LT_ES_f2_before_3	RT_ES_f2_before_1	RT_ES_f2_before_2	RT_ES_f2_before_3	LT_LD_f2_before_1	LT_LD_f2_before_2	LT_LD_f2_before_3	RT_LD_f2_before_1	RT_LD_f2_before_2	RT_LD_f2_before_3	LT_LT_f2_before_1	LT_LT_f2_before_2	LT_LT_f2_before_3	RT_LT_f2_before_1	RT_LT_f2_before_2	RT_LT_f2_before_3	LT_MD_f2_before_1
1	40.8	43.9	44.3	27.9	28.9	24.6	9.6	8.7	8.9	3.3	3.5	3.5	6.6	7.6	8.2	40.7	41.9	49.4	2.2	2.2	2.4	30.3	28	31.6	8.2	8.2	6.9	7.9	7.6	7.1	48	53.4	51.4	32.9	35.3	40.1	9.1	9.2	9.2	6.8	7.2	12.4	8.2	11	8.6	67.3	67.8	56.5	1.7
2	30.3	34.4	34.2	17.5	20.4	22.2	7.2	8	7.2	7.6	8	7.1	47.1	52.6	55.4	19.4	19.4	23.7	5.6	5.9	6.1	7.6	9.1	10	15.5	14.3	12.3	9.2	9.4	8.2	29.8	31.6	31.6	27.6	28.7	27.4	10	9.5	9.5	12.2	11.4	11.8	67.7	67.5	71.2	33.9	37.6	38.1	8.7
3	23.4	19.5	20.6	19.3	20.4	22.3	7.3	8.3	7.8	12.4	11.9	11.4	14.8	10.9	7.8	5.2	7.5	4.5	2.5	2.3	2	5.5	5.5	4.4	4.2	4.3	3.8	5.4	5.6	4.8	25.4	24.6	23	25.6	23.2	26.7	8.9	9.7	10	13.9	12.6	15.3	17.1	14.6	11.3	10.9	9.7	7.4	3.3
4	37	41.1	43.8	40.1	32	38.4	5.9	6.9	6.1	6.5	5.6	6.4	6.2	7.5	9.7	12.2	9.8	12.9	3.8	3.3	3.4	6.4	5.5	7	4.4	4.7	5	2.5	2.2	2.4	43.2	45.6	42.1	39.3	40.8	35.1	7.1	8.4	8.4	7.6	8.4	7.7	7.5	7.6	9.6	11	12.5	15.5	3.8
5	70.6	66.3	72.5	48.6	44.1	55.7	3.4	3.1	3.2	5.3	5.1	5.2	41.7	35.5	33.7	27.5	20.8	17.7	4.2	3.4	3.8	2.3	2.3	1.4	3.5	3.6	3.9	2.1	2.3	2.6	72.6	77.5	75.8	58	64.5	71.2	3.6	3.4	3.6	6.8	7.4	7.8	29.3	36.6	32.8	24.1	21.7	15.3	3.7
6	26.6	23.6	26.2	23.7	20.6	22.7	11.4	11.4	13.5	8.4	10.6	7.7	32.1	20.5	26.5	29.1	24.4	18.7	12.8	10	12.1	3.8	4.9	2.8	63.2	62.7	67.3	21	20.8	22.1	30.3	33.1	37.7	35.3	36.2	34.7	11.8	13.8	13.1	13.1	14	14.4	36.9	32.3	41.4	74.9	42.7	67.5	41.4
7	27.1	30.4	33.1	18.7	21.4	18.3	7.3	8.4	9.6	5.2	5.7	6.5	11.2	16.9	13.5	37.2	41.3	40.6	2.6	2.4	2.2	1.7	1.7	2.3	7.5	7.4	9.2	3.9	4.2	4.9	29.2	31	33.3	27.3	27.5	25.4	11.7	11.4	11.5	9	9.4	9.4	34.6	35.7	31.9	46.5	62.4	53.2	4.5
8	33.5	42.2	32	28.7	27.3	28.5	5.7	6.2	5.5	3.1	3.1	3.6	22.1	15.8	11.8	21	14.9	13.4	4.8	4.9	4.9	5.2	4	4.8	14.5	17.7	14.1	7.1	7.7	7.5	43.8	41.9	41.5	34.7	38.8	36.2	8.6	8.2	8.3	4.6	4.8	4.5	20.6	14.6	17.1	28	22.8	28.4	4.6
9	19.3	19.3	38.2	21.3	21	24.7	10.5	8.4	8.2	4.3	4.9	8.2	13.3	13.6	11.6	8.8	8.8	8.6	5.2	5.2	5.9	2.6	3.7	3.4	5.4	4.8	6.4	2.3	1.5	6.1	32.1	33.1	34.6	28.4	29.3	43.9	9	9.6	8.5	10.7	10.7	10.2	16.3	16.6	20	10.8	8.8	11.2	4.3
10	50.9	52.5	48.9	20.4	21.1	19.1	7.4	7.7	7.7	4	4.2	3.5	15.3	16.9	15.7	28.2	29.8	31.1	2.4	2.3	2	5.9	5.4	4.8	14.9	13.2	12.5	6.9	6.6	7	51.6	48.2	50.1	31.1	31.3	30.5	8.6	8.2	8.3	6.1	6	6.2	20.4	24.7	26	26.6	33	32.4	4.1
11	53.8	72.1	69.4	25.4	36.3	36.4	13.4	11	7.7	2.6	9.9	5	5.1	4.2	6.4	29.2	6.1	8.9	2.9	7.3	5.3	29	7.1	5.1	20.2	34.7	25.9	10.5	34.9	18.7	56.5	66	62.7	26.6	53	52.2	11.3	9	7.7	3.5	6	5.9	7.3	10.2	22.7	38.5	3.2	8	3.1
12	47.4	44.4	45.3	29.4	25.9	22.5	7.2	6.4	7.7	3.3	3.6	3.4	5.5	11.9	17.2	3.9	5.6	4.9	5.2	4.2	3.9	3.1	3.1	4	22	19.8	22.1	10.5	9.9	10.5	49.2	44.2	45.8	30.2	23.9	23.9	8.7	6.9	7.4	5.6	4	4.4	29.7	27	29.5	6.2	6.5	7.7	10.1
	LT	left side
	RT	right side
	ES	erector spinae
	LD	latissimus dorsi
	LT	lower trapezius
	MD	middle deltoideus
	PM	pectoralis major
	f1,f2,f3	phase
	before,after	before/after ergonomic instruction
	_1,_2,_3	number of tial
	actII	activity II
[truncated: 41 more columns]

## Sheet: EMG activity I after
lp	LT_ES_f1_after_1	LT_ES_f1_after_2	LT_ES_f1_after_3	RT_ES_f1_after_1	RT_ES_f1_after_2	RT_ES_f1_after_3	LT_LD_f1_after_1	LT_LD_f1_after_2	LT_LD_f1_after_3	RT_LD_f1_after_1	RT_LD_f1_after_2	RT_LD_f1_after_3	LT_LT_f1_after_1	LT_LT_f1_after_2	LT_LT_f1_after_3	RT_LT_f1_after_1	RT_LT_f1_after_2	RT_LT_f1_after_3	LT_MD_f1_after_1	LT_MD_f1_after_2	LT_MD_f1_after_3	RT_MD_f1_after_1	RT_MD_f1_after_2	RT_MD_f1_after_3	LT_PM_f1_after_1	LT_PM_f1_after_2	LT_PM_f1_after_3	RT_PM_f1_after_1	RT_PM_f1_after_2	RT_PM_f1_after_3	LT_ES_f2_after_1	LT_ES_f2_after_2	LT_ES_f2_after_3	RT_ES_f2_after_1	RT_ES_f2_after_2	RT_ES_f2_after_3	LT_LD_f2_after_1	LT_LD_f2_after_2	LT_LD_f2_after_3	RT_LD_f2_after_1	RT_LD_f2_after_2	RT_LD_f2_after_3	LT_LT_f2_after_1	LT_LT_f2_after_2	LT_LT_f2_after_3	RT_LT_f2_after_1	RT_LT_f2_after_2	RT_LT_f2_after_3	LT_MD_f2_after_1
1	34.8	33.3	38.3	34.5	34	36.6	6.3	6	7.8	4.5	4.5	5.4	16.9	15.3	15.2	12.3	12.8	15.3	4.8	4.3	7.6	7.5	6.6	9.6	9.2	9.1	9.9	7.7	7.3	9.3	41	40.3	39.5	35.3	36	36.3	6.8	6.2	6.7	5	5.1	4.8	19.4	16.9	14.2	20.7	20.3	18.6	5.2
2	19.8	24.5	28	23	28	22.8	6.6	7.3	7	7.6	9.1	8.2	21	56.6	55.3	17.5	18.3	23	6.8	8.6	7.4	9.4	10.7	8.1	16.4	16.9	14.5	9.6	9	8.9	31	32.3	35.1	30.9	28.2	30.5	8.6	8.9	9.8	11.3	11.8	10.5	43.3	60.9	66.4	34.5	34.4	39.9	7.9
3	16.9	18	18.2	21.2	21.3	22.3	7.4	8.2	7.4	10.9	10.2	9.2	15.3	13.5	10.8	9.1	9.3	7.8	2.5	2.6	2.7	6.3	5.6	5.8	4.9	4.9	4	4	5	4.3	22.6	24.2	19.7	23.7	24.5	22.5	10.4	11.4	9.6	13.8	13.2	12.7	18.9	19	14.7	12.5	12.8	9.6	4.1
4	36.7	40.6	38	34.7	33.4	36.5	7	6.2	6.7	5.8	6.1	6.1	5.2	6.6	5.4	7.9	9.3	8.1	3	2.8	2.7	5.3	5	4.1	4.4	4.8	4.1	2.3	2.6	2.3	36.5	41.7	40.6	48.9	43.1	46.7	8.1	8.8	8.9	7.2	7.5	7.4	6.8	7.6	6.5	9.5	10	9.8	3.1
5	50.3	59.6	62.9	54.8	55.3	60.9	3.6	4.2	3.8	6.7	6.9	7.2	21.1	34.3	33.6	19.7	18.6	13.5	3.1	6.5	4.3	2	3.1	2.1	9.7	4.8	4.1	11	5.3	4.4	59.9	55.6	70.5	49.1	58.1	73.4	3.7	3.3	3.6	6	7.1	8.4	20	36.7	35.3	18.1	21	21.4	2.5
6	27.5	28.4	25.4	24.5	23.1	24.1	9.9	14.6	11.8	8	9	8.3	31.8	42.7	35.6	35.8	46.2	42.1	11.4	14.1	13.4	2.3	2.2	3.7	46.5	37.5	25.7	21.2	19.3	23.4	28.3	30	25.7	31.5	32.4	27.4	13	10.7	11.7	13.7	13.5	14	30	38	54.6	38.8	59.1	65.5	28.9
7	30.8	25.1	22.9	21	23.6	25.4	9.3	9.3	8.7	6.1	6.7	6.6	24.7	18.4	21.6	51.9	53.5	55.3	2.8	3.3	2.8	5.3	3.9	3.8	10.2	9.6	9.1	4.2	3.8	3.6	26.5	22.4	24.1	19.3	17.3	17.4	9.6	9.6	9.3	6.2	5.9	6.7	33.4	32.9	30.3	38	62.1	56.2	3
8	28.7	27.7	29.2	27.9	30	32	5.4	5.7	5.6	3.2	3.4	3.7	24.2	16.2	13.7	23	20.5	15.7	4.6	4.9	5.6	4.5	5.1	5.1	16.1	15	15	7.2	6.8	7.6	40.9	40.9	38.5	31.8	32.8	34.8	10.2	9.2	9	4.9	5.2	4.8	27.5	26.2	21.9	33	32.9	28.9	8.4
9	20.3	11.3	23.3	21	13	26.9	8.5	5.2	8.2	5.9	3.8	6.2	13.1	8.3	15.2	9.8	9.5	10.3	4.2	2	4.5	3.6	1.5	3.5	4.4	4.5	5	2.6	2	2.9	30.1	30.9	33.5	29.4	30.7	30.8	9.1	9	9.1	9.7	8.2	9.2	16.3	19.8	18.4	11.8	13.8	13.6	4.2
10	52.5	26.4	32	19.4	18.9	20.6	7.4	6.9	6.9	4.1	4.5	4	23	23	24.4	24.5	26.3	30.1	2.1	1.7	2.1	4.4	5.8	4.7	11.5	10.5	11.5	4.7	4.8	4.6	44.8	41.6	42.3	38.2	35.8	37.3	10	9.8	9.9	8.1	7.7	8.2	28.7	25.8	28.4	27.1	25.2	24.6	4.3
11	53.7	62.2	35.7	39	57.3	19.4	5.1	6.2	2.1	4.5	3.9	2.5	9.3	14.7	2.3	8.1	9.8	5.3	12	12.1	1.6	8.1	9	3.4	21.5	18.7	20.4	12.2	10.6	9.4	68.6	53.3	39.3	58.9	43.8	22.4	11.8	8.3	3.1	6.8	4.7	2.9	8.7	10.9	2.5	8.9	9.5	7.7	8.6
12	30.4	29.1	29.4	27	24.1	25	7.2	5.1	5.5	4.7	3.3	4.2	14.5	19.8	16.8	5.9	3.8	5.3	4.6	3.4	4.2	2.8	2.2	2.1	19.2	16.5	19.1	12.5	9.4	10.9	40.3	38.7	39	32	29.1	30.7	8.3	6.7	7.4	5.8	4.8	5.3	14.6	15.2	10.9	8.8	5.8	7.7	6.1
	LT	left side
	RT	right side
	ES	erector spinae
	LD	latissimus dorsi
	LT	lower trapezius
	MD	middle deltoideus
	PM	pectoralis major
	f1,f2,f3	phase
	before,after	before/after ergonomic instruction
	_1,_2,_3	number of tial
	actII	activity II
[truncated: 41 more columns]

## Sheet: EMG activiti II before+after
lp	LT_ES_actII_before_1	LT_ES_actII_before_2	LT_ES_actII_before_3	RT_ES_actII_before_1	RT_ES_actII_before_2	RT_ES_actII_before_3	LT_LD_actII_before_1	LT_LD_actII_before_2	LT_LD_actII_before_3	RT_LD_actII_before_1	RT_LD_actII_before_2	RT_LD_actII_before_3	LT_LT_actII_before_1	LT_LT_actII_before_2	LT_LT_actII_before_3	RT_LT_actII_before_1	RT_LT_actII_before_2	RT_LT_actII_before_3	LT_MD_actII_before_1	LT_MD_actII_before_2	LT_MD_actII_before_3	RT_MD_actII_before_1	RT_MD_actII_before_2	RT_MD_actII_before_3	LT_PM_actII_before_1	LT_PM_actII_before_2	LT_PM_actII_before_3	RT_PM_actII_before_1	RT_PM_actII_before_2	RT_PM_actII_before_3	LT_ES_actII_after_1	LT_ES_actII_after_2	LT_ES_actII_after_3	RT_ES_actII_after_1	RT_ES_actII_after_2	RT_ES_actII_after_3	LT_LD_actII_after_1	LT_LD_actII_after_2	LT_LD_actII_after_3	RT_LD_actII_after_1	RT_LD_actII_after_2	RT_LD_actII_after_3	LT_LT_actII_after_1	LT_LT_actII_after_2	LT_LT_actII_after_3	RT_LT_actII_after_1	RT_LT_actII_after_2	RT_LT_actII_after_3	LT_MD_actII_after_1
1	27.9	32.4	32.9	27.4	29.4	33.1	5.6	6.9	7.7	3	3.4	3.7	5.1	5.1	4.8	2.9	5.8	3.8	2	1.8	2.1	7	12.5	10.8	7.4	7.6	8.2	8.7	9.7	10.4	31.4	25.4	26.8	19.9	16.4	19.9	6.1	5.7	5.5	3.1	4.6	3	4.5	4.3	4.1	5.4	4.6	6.1	1
2	21.4	22.5	19.8	10.8	9.3	8.9	6.3	6.7	6.3	6.3	5.8	6	26.2	27.2	25	22.4	24.7	19.7	5.3	4	4.2	7.7	8	9.3	12.5	10.1	10.2	10.5	9.4	8.6	17.1	15.5	15	8.8	7.9	7.2	5	5.3	5	9.9	7.3	7.5	24.7	25.1	24.4	25.2	23.7	24.9	4.2
3	18.1	17.1	17.3	10.2	9.8	9	13.7	13	13.6	12.8	13.8	10.8	9.9	10.4	10.1	14.7	13.6	13.3	1.8	1.6	1.7	8.4	10.7	11.2	3.7	3.5	4.6	5.1	4.3	4.6	18.7	14.3	13.1	10.3	8.5	9	14.1	12.8	12.4	13.6	10	10.3	12.3	10	12.5	17	13.2	15.3	1.8
4	23.6	22.2	26.1	18.4	19.2	19.1	5.7	6.1	5.8	4.5	5.1	5.6	1.9	1.8	2	6.9	6.9	10.4	6.5	6.7	6.3	5.5	4.4	7.7	4.7	4.5	4.7	2.3	2.3	2.4	12.9	14.7	12.8	14.3	15.2	16.4	5.6	5.5	6.6	17.7	11.6	12	1.5	1.5	1.5	5.7	5.4	5.1	6
5	53.5	47.1	34.4	26.8	27.8	33	3	2.8	2.5	2.6	2.6	2.4	24.6	20.9	17.2	14.5	16.1	14.1	4.5	3.8	3.7	1.4	1.2	1.2	2.8	3	3.2	4	3.9	3.7	36.7	44.5	30.9	33.3	40.4	28.8	2.8	2.1	2.6	2.5	2.1	2.4	19.9	16.2	18.6	11.8	13.9	15.4	4.4
6	19.6	18.3	18.1	11.2	10.9	9.6	13.5	12	10.2	7.2	6.2	6.2	25.6	21.9	22.6	39.1	78.9	36.1	5.4	4	4.7	6.8	7.6	6.2	30.5	43.8	44	17.7	17.2	15.9	19.9	16.3	12.3	15.2	12.9	10.6	10.5	11	9.1	7.2	7.2	7.2	19.6	20.9	20.6	39.1	50.9	36.1	5.3
7	20.3	18.4	23.9	10.1	11.6	13.1	7.8	7.6	7.9	5.2	4.6	4.4	11.4	11.8	13.7	20.4	20.3	21.3	1.9	1.5	1.4	1.3	1.9	1.3	8.4	6.6	6.6	4.2	4.1	4.7	10.3	10.1	11.5	7.9	8.7	8.7	6.8	6.3	6.2	6.2	4.7	4.1	13.2	16	16.2	28.1	31.1	27.7	5.9
8	25.5	22.5	25.5	15.2	15	16.5	5.6	4.6	5.8	2.8	3.5	3.3	5.4	5.5	5.8	5.4	8.9	10.8	1.1	1.3	1.2	2.1	2.4	2.3	14.1	12	13.7	8.6	8.2	7.5	11.7	11.7	14.2	10.5	10.7	9.7	5.9	6.2	6	4.4	3.9	3.5	4.6	2.8	4.5	15.2	15.1	15.9	0.6
9	26.1	25	26.3	19.8	16.4	18.6	11.2	10.1	10.1	8	6.1	7.7	10	9.5	9.1	17	18.5	19	2.6	2.6	2.5	3	3.1	3.3	4.9	4.4	4	4	3.3	3.2	21.3	23.5	23.3	18.3	16.8	19	8.8	8.9	9.9	8.8	5.9	6.2	9.1	9.8	8.5	18.6	25	21.1	1.8
10	49.4	44.8	49.7	19.2	19.2	18.3	8.6	7.1	8	4.2	3.5	3.5	9.5	11.2	11.2	20.9	20.2	20.2	1.8	1.9	2.2	4.5	4.8	3.5	10.5	11.2	10.8	9.4	10.2	10.5	23.9	24	20.1	12.2	12.4	13.9	4.7	5.6	5.7	2.9	3.2	3.1	13.1	13.1	12.5	18.5	18.5	16.3	2.5
11	41	38.4	42.3	23.8	27	22.9	8.8	11	8.3	2.5	2.6	2.6	3.2	3.4	3	3.1	4.8	3.8	3.5	2.9	2.9	5.8	8.5	6.1	21.5	19.7	20.2	15.7	14.7	16	37.8	36.1	35.6	25	26.4	25.4	12.1	9.5	10.1	3.1	2.8	2.9	2.3	2.7	2.8	6.8	12.3	10.3	2.9
12	39.9	31	32.4	19.4	20	20.4	5.6	5.4	5.2	5.6	3.2	3.4	4.1	6.3	8.6	3.2	3	3.6	3.9	4	3.2	2	1.9	2.3	11.6	13.7	11.3	10.2	9.9	8.4	36.7	32.1	30.4	18.6	14.6	15.3	18.8	13.9	7	9	7	4.5	2.2	3.1	1.9	3.2	3.5	2.4	4.8
	LT	left side
	RT	right side
	ES	erector spinae
	LD	latissimus dorsi
	LT	lower trapezius
	MD	middle deltoideus
	PM	pectoralis major
	f1,f2,f3	phase
	before,after	before/after ergonomic instruction
	_1,_2,_3	number of tial
	actII	activity II
[truncated: 11 more columns]

## Sheet: ROM activity I before
lp	max_KS1B_before_1 [deg]	max_KS1B_before_2 [deg]	max_KS1B_before_3 [deg]	max_KL5B_before_1 [deg]	max_KL5B_before_2 [deg]	max_KL5B_before_3 [deg]	max_KL4B_before_1 [deg]	max_KL4B_before_2 [deg]	max_KL4B_before_3 [deg]	max_KL3B_before_1 [deg]	max_KL3B_before_2 [deg]	max_KL3B_before_3 [deg]	max_KL2B_before_1 [deg]	max_KL2B_before_2 [deg]	max_KL2B_before_3 [deg]	max_KL1B_before_1 [deg]	max_KL1B_before_2 [deg]	max_KL1B_before_3 [deg]	min_KS1B_before_1 [deg]	min_KS1B_before_2 [deg]	min_KS1B_before_3 [deg]	min_KL5B_before_1 [deg]	min_KL5B_before_2 [deg]	min_KL5B_before_3 [deg]	min_KL4B_before_1 [deg]	min_KL4B_before_2 [deg]	min_KL4B_before_3 [deg]	min_KL3B_before_1 [deg]	min_KL3B_before_2 [deg]	min_KL3B_before_3 [deg]	min_KL2B_before_1 [deg]	min_KL2B_before_2 [deg]	min_KL2B_before_3 [deg]	min_KL1B_before_1 [deg]	min_KL1B_before_2 [deg]	min_KL1B_before_3 [deg]	max_KS1S_before_1 [deg]	max_KS1S_before_2 [deg]	max_KS1S_before_3 [deg]	max_KL5S_before_1 [deg]	max_KL5S_before_2 [deg]	max_KL5S_before_3 [deg]	max_KL4S_before_1 [deg]	max_KL4S_before_2 [deg]	max_KL4S_before_3 [deg]	max_KL3S_before_1 [deg]	max_KL3S_before_2 [deg]	max_KL3S_before_3 [deg]	max_KL2S_before_1 [deg]
1	21.5	16.6	18.9	28.7	22.9	25.1	27	20.6	23.9	26.2	20.5	22.1	36	29.4	29.7	33.2	25.7	27	-3.2	-7.2	-3.1	-2.9	-6	-2.4	-5.2	-10.1	-5.3	-6.3	-10.8	-7.5	-11.1	-13.4	-16	-12.1	-16.4	-14.9	37.4	37.5	38.9	32	29.4	29.3	24.2	25.5	26.3	32.7	32.1	35.3	21
2	21.7	19.6	22.1	42.7	37.8	40.2	45.5	42.9	45.3	48.3	44.1	45.7	51.1	54.6	51.6	63.4	64.2	61.7	-3.8	-9	-8.9	-0.2	-8.36	-2.2	0	-9.658	0	-0.1	-11.3	-0.2	-1.3	-6.2	0.4	-0.7	-0.5	0.4	4.5	0.6	0.6	7.6	1	2.4	0.7	0.2	1.1	12.1	17.8	14.9	26.7
3	32.3	27.1	29.8	49.4	44	44.2	38	32.6	29.6	38.4	33.3	34.5	52	42.9	42.6	43.1	40.1	37.5	-0.8	-3.1	-3.3	-0.3	-0.6	-1.8	-7	-7.9	-10.7	-1.3	-1.5	-1.1	-1.6	-0.6	-1.8	-5.8	-4.9	-4.8	2.4	2.2	2.2	2	5	5	2.3	4.7	4.5	1.6	4	4	1.4
4	21	21.5	23.1	26.7	26	26.9	22.7	24.2	25.6	29.5	27.8	30.4	35.9	33.7	34.8	36.4	33.3	35.8	-12.9	-12.9	-12.7	-10	-8.7	-11.4	-14.7	-12.3	-13.1	-11.5	-12.2	-12.7	-11.4	-12.1	-13.1	-9.5	-10.9	-11.5	5.2	7	6	5.7	6.3	5.1	3.2	4.6	3	13.8	15.4	12.2	27.4
5	23.1	29.5	28.4	31.2	38.1	40.4	20.9	16.4	20.2	38.1	53.7	48.5	41.1	57.6	52.8	47.8	52	56	-10.5	-6.3	-10.4	-18.9	-17	-18.9	-21.2	-23.3	-24.9	-8.1	0	-5.6	-9.4	0	-6.3	-6	-8.2	-9.2	4	2.1	4	3.3	15.9	16.1	3	0	6.7	3.4	27.4	13.9	14.3
6	13.8	11	17	44.4	43.9	47	37.9	33.2	38.3	49	46.4	52.5	41.8	36.5	41.4	39.7	37	42.8	-11.9	-13.6	-9.4	-1.2	-4.1	-0.3	-11.3	-18.4	-13.1	-0.7	-0.3	0	-6.7	-13.7	-9.9	-11.5	-17.5	-11.7	3.4	0.1	11.5	2.8	0.3	11.4	2.8	5.9	0.8	16	22.4	18.7	23.1
7	10.7	34.2	28	27.1	41.1	42	13.7	29.8	37.7	14.7	22.7	29.7	29.7	27.6	35.7	41.4	38.4	45	-10.5	0	-5.9	-7.2	-0.4	-3.9	-27.6	-20.8	-16.2	-16.1	-14.6	-11.3	-6.8	-11.2	-9.1	-2.6	-8.9	-2.1	3.1	0	11.1	5.9	0	13.8	15.5	0	14	4.2	0	10.2	6.3
8	38.7	32.3	27.6	27.3	25.5	18.8	33.1	27.8	25.7	49.7	45.1	41.7	41.7	45.1	40.7	52	50.9	46.5	-4.1	-4.7	-10.3	-6.8	-4.1	-9.6	-13.9	-13.8	-15.8	-9.2	-5.5	-7	-8.7	-4.6	-7.8	-8.3	-5.7	-6.5	13.6	12	17.9	1.7	1.2	5.3	2	2.9	1.4	14.9	13.1	15.8	34.2
9	10.7	10.8	14.1	14.8	18.8	22.3	18.4	22	23	32.4	35.5	38.6	42	37.1	44	48.3	44.9	45.9	-15.6	-17.4	-15.5	-11	-11.1	-10.6	-17.3	-17.5	-18	-21.4	-17.6	-15.7	-14.9	-15.3	-15	-22.2	-20.5	-19	5.9	8	6.8	7.5	8.4	6.7	6.9	5.9	7.1	7.3	5.9	6	9.4
10	21.6	24.6	33.5	23.3	31.2	29.3	24	35.3	38.8	23.6	39	35.5	41.8	52.2	43.9	38.6	52	46.3	-9.7	-5	-0.1	-11.8	-0.5	-1.1	-19.6	-12.9	-14.9	-18.2	-1.1	-1.7	-19.3	-5.4	-9.1	-17.7	-4.3	-7.1	3.4	2.5	4.6	6.5	6.1	2	9.3	4.1	4.8	27.2	19.3	17.4	19.8
11	13.3	24.8	21.7	15	32	32.1	11.5	27.6	22.1	12.2	34.8	30.2	17.4	35.6	30.1	14.7	33.5	27.1	-3.8	-0.7	-3.9	-8.3	-4.6	-5	-12.8	-9.4	-11.7	-16.2	-7	-11.9	-10.2	-6.1	-6.7	-13.9	-9	-12.3	1.9	4.2	3.3	10.9	14.9	15.5	5.1	7.9	3.2	10.3	9.7	12.8	17.8
12	33.7	27.4	33.8	35.1	21.9	28.8	32	24.7	25.5	59.9	47.2	49.6	37.1	37.6	39	38.5	38.2	40.2	-8.6	-12.2	-4.1	-8.4	-12.1	-5.5	-11.9	-26.9	-11.8	-12	-17.7	-15.3	-17.4	-15.3	-12.6	-19.5	-17	-17	0	7.9	4.1	18.2	12.8	13.2	0.3	10.8	4.3	31.8	39.6	29.4	20.2
	LT	left side
	RT	right side
	K	angle
	S1,L5,L4,L3,L2,L1	number of vertebra
	B	frontal plane
	S	sagittal plane
	before,after	before/after ergonomic instruction
	_1,_2,_3	number of tial
	actII	activity II
[truncated: 23 more columns]

## Sheet: ROM activity I after
lp	max_KS1B_after_1 [deg]	max_KS1B_after_2 [deg]	max_KS1B_after_3 [deg]	max_KL5B_after_1 [deg]	max_KL5B_after_2 [deg]	max_KL5B_after_3 [deg]	max_KL4B_after_1 [deg]	max_KL4B_after_2 [deg]	max_KL4B_after_3 [deg]	max_KL3B_after_1 [deg]	max_KL3B_after_2 [deg]	max_KL3B_after_3 [deg]	max_KL2B_after_1 [deg]	max_KL2B_after_2 [deg]	max_KL2B_after_3 [deg]	max_KL1B_after_1 [deg]	max_KL1B_after_2 [deg]	max_KL1B_after_3 [deg]	min_KS1B_after_1 [deg]	min_KS1B_after_2 [deg]	min_KS1B_after_3 [deg]	min_KL5B_after_1 [deg]	min_KL5B_after_2 [deg]	min_KL5B_after_3 [deg]	min_KL4B_after_1 [deg]	min_KL4B_after_2 [deg]	min_KL4B_after_3 [deg]	min_KL3B_after_1 [deg]	min_KL3B_after_2 [deg]	min_KL3B_after_3 [deg]	min_KL2B_after_1 [deg]	min_KL2B_after_2 [deg]	min_KL2B_after_3 [deg]	min_KL1B_after_1 [deg]	min_KL1B_after_2 [deg]	min_KL1B_after_3 [deg]	max_KS1S_after_1 [deg]	max_KS1S_after_2 [deg]	max_KS1S_after_3 [deg]	max_KL5S_after_1 [deg]	max_KL5S_after_2 [deg]	max_KL5S_after_3 [deg]	max_KL4S_after_1 [deg]	max_KL4S_after_2 [deg]	max_KL4S_after_3 [deg]	max_KL3S_after_1 [deg]	max_KL3S_after_2 [deg]	max_KL3S_after_3 [deg]	max_KL2S_after_1 [deg]
1	51.8	40.9	51.4	62.1	57.8	64.3	45.2	41.7	49.3	56.9	48.5	56	55.2	56.9	63.6	55.1	61.6	69.3	-7.5	-9.2	-5.8	-7.3	-11.1	-8.9	-11.9	-12.4	-11.1	-12.9	-12.5	-11.6	-16.8	-15.9	-15.7	-14.6	-14.5	-16.1	30.1	28.4	32.9	10.7	16.9	18.8	10.2	10.4	11.9	24.4	20.4	20.4	20.3
2	7.4	11.2	24.4	52.4	57.3	53.4	53.4	56.7	51.7	59.1	62.2	47.1	63.6	65.9	53	73.3	75.8	50.1	-23.2	-21.5	-15.7	-8.2	8.3	-5.8	-3.5	2	-4.2	-5.2	0	-9.4	-0.1	0.3	-7.9	0	-0.3	-20.2	11.7	11.5	3.8	4.5	8.2	13.2	2.1	5.3	13.8	27.7	22.5	27.6	42
3	22.7	37.3	39.3	40.4	53.5	66.2	31.7	32	46.3	33.8	33	46.2	39.4	40.5	45	35.6	42.8	38.5	-2.2	-3.5	-4.1	-0.1	-1.3	0	-6.1	-13.7	-5.8	0	-4.7	-1	0	-1.8	-1.6	-1.5	-3.2	-4.8	1.1	1.7	1.5	0.3	4.8	4.4	1.4	3.1	4.8	0.2	2.3	2.8	0
4	22.8	17.4	6.2	27.3	26.9	20.9	30.5	25.9	23.2	33.9	30	23.5	38.4	31.7	28.4	43	37.6	31.3	-11.7	-13.2	-22.2	-10.2	-11.6	-9.4	-17.2	-18	-16	-15.2	-11.5	-11.5	-12.7	-10.1	-10.7	-13	-9	-10.1	5.3	4.6	7.9	8.2	6.5	5.7	4.9	1.9	1.7	25.8	20.2	19.5	35.8
5	15.9	15.9	20.6	25.8	25.8	31.2	16.2	14.6	17.6	27.1	32.3	32	28.7	36.1	32.5	30.8	35.7	33.7	-13.8	-11.3	-5.5	-23.3	-16.2	-10.2	-26.3	-18.5	-14.9	-9.4	-4.2	-3.9	-12.1	-3.8	-8.5	-18.5	-8.4	-9.1	1.3	2	2	1.3	1.4	1.8	4.3	2.6	3.3	5.7	2.5	1.1	20.1
6	17.5	11.7	15.9	48.1	43.5	47.4	40.9	33.6	37.1	54.9	48.6	51.5	46.8	39.6	40.9	48.4	39.5	42.7	-9.8	-12.8	-10.3	0	-0.3	-0.5	-10.6	-13.1	-12	0	-0.1	-0.1	-5.1	-7.7	-7.1	-7.8	-10.4	-8.8	0.1	0.5	19.3	2.2	2.5	16	10.5	5	4.2	24.6	21.3	17.8	29.7
7	29	32.1	30.2	46.5	46.3	40.9	43.8	41.5	42.4	31.5	33.8	30.5	33.7	30.6	30.4	44.9	41.2	42.2	-5.1	-3.3	-2.4	-2.4	-2.7	-2.7	-6.7	-9.6	-5.6	-7.6	-7.3	-5.2	-7.6	-11.1	-8.4	0	-2.7	-0.6	3.5	6	5.4	3.9	5.9	6.7	6.6	6	6.2	2	2.4	2	3.7
8	30.4	33.6	34	19.3	22.1	20.2	30.6	30.6	34.5	42	45	48.7	36.7	41.5	45.8	39.8	42	48.2	-3.8	-7.5	-10.7	-11.8	-10.3	-12	-13.8	-17.2	-13.9	-6.2	-11.6	-15.2	-7.1	-12.7	-16.5	-5.4	-14.2	-17.3	24.2	18.1	19.1	4.5	5.6	5	1.2	1.7	0.6	17.9	11.8	13.3	36.9
9	16.3	12.9	16.3	28.9	20	23.6	22.3	26.9	28.6	43.1	40.1	39.5	36.8	37.2	33.5	41.5	42.1	41.2	-17.1	-19.5	-16.5	-14.4	-18.7	-13.7	-23.7	-20.9	-18.3	-20.3	-18	-18.4	-19.6	-16.2	-18.1	-23.8	-19.7	-22.9	6.7	8.4	6.1	14.2	13.3	10.9	7.7	8.6	7.5	5.7	6.9	6.3	8.6
10	26	30.8	30.2	19	20.2	20.9	36.1	38.4	35.3	35.9	38.6	35.8	44.6	45.4	41.8	45.7	47.5	44.8	-10	-8	-7.4	-12.3	-10	-11.9	-31.1	-33.1	-41.5	-15.3	-15.6	-22.9	-8.8	-6.8	-12.6	-9.1	-5.5	-11.7	2.2	2.7	1.2	3.5	3.4	3.2	11.4	16.5	17.2	27.1	32.1	33.2	20.1
11	13.6	11.8	13.6	24.4	19.8	20.7	28.3	19.4	25.7	41.9	31.5	44.1	54.3	41.6	54.4	52.6	38.1	51.2	-13.5	-8.3	-13.4	-15.2	-11.9	-18.5	-13.8	-12.4	-16.8	-11.2	-13.3	-10.5	-1.9	-4.6	-0.3	-5	-9.5	-5.7	1.3	0.9	2.5	9.6	3.5	7.4	10.1	1.6	6.5	9.6	3.7	17.3	10.4
12	41	39.1	31.3	36.3	32.4	27.2	29.3	27.1	18.6	54.7	51.2	36.4	44.8	38.9	30.6	45.5	37.6	31.7	-8.6	-8	-4.3	-9.7	-7.9	-2.7	-17.7	-13.4	-12	-10.9	-13.4	-10.3	-9.8	-12.7	-7.9	-8.8	-11.7	-7.1	0	0.2	4.3	1.6	2.4	2.9	2.8	2.6	2.7	24	24.8	25.1	2.3
	LT	left side
	RT	right side
	K	angle
	S1,L5,L4,L3,L2,L1	number of vertebra
	B	frontal plane
	S	sagittal plane
	before,after	before/after ergonomic instruction
	_1,_2,_3	number of tial
	actII	activity II
[truncated: 23 more columns]

## Sheet: ROM activity II before
obs	max_KS1B_actII_before_1 [deg]	max_KS1B_actII_before_2 [deg]	max_KS1B_actII_before_3 [deg]	max_KL5B_actII_before_1 [deg]	max_KL5B_actII_before_2 [deg]	max_KL5B_actII_before_3 [deg]	max_KL4B_actII_before_1 [deg]	max_KL4B_actII_before_2 [deg]	max_KL4B_actII_before_3 [deg]	max_KL3B_actII_before_1 [deg]	max_KL3B_actII_before_2 [deg]	max_KL3B_actII_before_3 [deg]	max_KL2B_actII_before_1 [deg]	max_KL2B_actII_before_2 [deg]	max_KL2B_actII_before_3 [deg]	max_KL1B_actII_before_1 [deg]	max_KL1B_actII_before_2 [deg]	max_KL1B_actII_before_3 [deg]	min_KS1B_actII_before_1 [deg]	min_KS1B_actII_before_2 [deg]	min_KS1B_actII_before_3 [deg]	min_KL5B_actII_before_1 [deg]	min_KL5B_actII_before_2 [deg]	min_KL5B_actII_before_3 [deg]	min_KL4B_actII_before_1 [deg]	min_KL4B_actII_before_2 [deg]	min_KL4B_actII_before_3 [deg]	min_KL3B_actII_before_1 [deg]	min_KL3B_actII_before_2 [deg]	min_KL3B_actII_before_3 [deg]	min_KL2B_actII_before_1 [deg]	min_KL2B_actII_before_2 [deg]	min_KL2B_actII_before_3 [deg]	min_KL1B_actII_before_1 [deg]	min_KL1B_actII_before_2 [deg]	min_KL1B_actII_before_3 [deg]	max_KS1S_actII_before_1 [deg]	max_KS1S_actII_before_2 [deg]	max_KS1S_actII_before_3 [deg]	max_KL5S_actII_before_1 [deg]	max_KL5S_actII_before_2 [deg]	max_KL5S_actII_before_3 [deg]	max_KL4S_actII_before_1 [deg]	max_KL4S_actII_before_2 [deg]	max_KL4S_actII_before_3 [deg]	max_KL3S_actII_before_1 [deg]	max_KL3S_actII_before_2 [deg]	max_KL3S_actII_before_3 [deg]	max_KL2S_actII_before_1 [deg]
1	11.2	17.4	18.5	14.7	23.2	24.9	11.1	21.1	21.5	12.3	21.1	21.9	14.3	28.7	26	13.4	25.2	23.7	-0.8	-2.8	-5.3	-0.4	-2.1	-4.2	-0.8	-6.8	-8.5	-0.3	-7.5	-8.6	0	-14.7	-15.3	0.2	-15.4	-14.1	20.3	18.3	15.4	9.4	8.9	8.3	10.7	7	8.6	11.9	10.1	10.6	11.9
2	5.5	1.6	4.1	20.6	17.8	25.5	15.9	14.6	13.8	14.1	13.2	11.4	15.5	14.8	12.1	22.5	20.8	17.6	-32.5	-38.8	-35.9	1	-2.2	0	0.2	-0.4	0.5	0.3	-0.3	0.8	-0.2	-1.7	-0.9	0.5	-0.2	0	1.3	3.7	2	6.1	6.7	4.5	0.7	1.2	1.7	28.8	27.6	25.4	44.9
3	15.5	8.8	10.5	11.258	18.4	17.1	5.115	0	0	4.369	7.9	4	18.254	21.3	9.9	12.1	12.8	3.8	-1.8	-6.1	-1.5	-0.6	-2.7	-2	-4.9	-28	-20.1	-1.5	-2.3	-5.3	-1.7	0	-7.4	-6.6	-0.3	-5.4	3.8	2.5	1.2	5.9	4.4	2.5	6.4	3.7	1.1	2.8	3	1.5	2.3
4	16.8	18.3	23.2	21.4	27.2	28.4	24.8	31.9	34.8	23.6	28.9	33.8	26.4	33.8	39.2	27.6	34.7	39.2	-6.9	-6.6	-8	-13.7	-10.1	-13.4	-15.1	-10.6	-11.3	-15.3	-12.9	-14	-17.7	-13	-13.7	-16	-11.9	-12.8	7.9	7.9	7.9	6	3.6	6.1	5.3	2.2	4.6	22.4	22.3	24.7	29.9
5	0	8.6	8.3	0	3.8	15.3	0	5.4	16.3	2.8	13.9	11.5	0.7	13.2	15.3	0.2	7.2	10	-13.2	-3.4	-1.8	-16.9	-7.1	0.5	-22.5	-13.9	-2.2	-16.2	0	-1	-20.1	0	-0.5	-23.6	-1.5	0	2	2.1	2	2.5	2.3	4	2.2	3	7.6	9.1	7.7	0	29.3
7	13.2	14.7	14.7	20	19.9	21.3	14.3	14.2	10.7	10.4	15	12.8	10.1	16.4	15.8	19	24.4	24.3	-0.5	-3.4	-0.5	-0.2	-3.3	-0.3	-3.8	-3.6	-2.8	-0.9	-2.7	-1.5	-1.4	0	0	0	0	-0.1	0.8	3.8	2.8	6.9	4.7	6.1	15.5	11	5.9	3.8	3	3.5	3.6
8	6.1	9.7	8.3	6.3	7.3	4.4	6.6	11	10.5	8.3	13.8	11.6	9.3	15	12.9	10.4	12.4	15	-8.3	-10.2	-9.4	-9.6	-11.6	-10.5	-9.2	-11.7	-10.3	-14.7	-13	-15.2	-15.3	-14	-16.7	-14.2	-14.8	-17.5	19.3	20.2	18	0.4	3	6.7	0.6	0.7	4.3	16.1	9	12.4	28.8
9	21.5	22.8	21.1	18.6	16.8	18.1	30.9	30.6	31.2	35.7	36.6	36	36.4	38.9	37.2	44.8	48.4	45.1	-9.6	-9.2	-13.3	-11.2	-9.4	-11.6	-16.3	-16.3	-19.9	-17.3	-17.5	-21.8	-13.8	-15.4	-18.5	-18.3	-19.8	-23.7	3.5	6.9	3.7	9.2	14.1	10.7	6.2	9.5	6.8	6.3	7.5	6	11.9
10	13.7	16	13.5	15.4	16.9	12.9	35.9	32.4	32.1	36.1	32.8	32.4	38.5	38.4	36.2	42.3	43	40.2	-6.3	-4.1	-4.9	-5.3	-4.9	-4.1	-15.4	-22.9	-20.1	-1	-6.3	-3.1	-2.4	-4.2	-3.6	-1.1	-1.3	-1.8	1.2	0	2.1	2.3	3.2	3.7	15	17.7	16.4	30.9	36.9	28.5	26.5
11	2.2	3.6	2.3	3.2	6.9	6.1	2.8	7.9	7.1	9	6.9	7.2	7.6	10.6	9.4	9	9.8	9.6	-9.2	-6.7	-7.2	-15.3	-8.8	-8.1	-12.9	-8	-8	-11.5	-5.2	-9.8	-5.7	-0.2	-1.2	-5.4	-0.2	-3.3	0.2	0.3	1	0.8	1.8	2.9	1.7	2.4	2.5	5	7.6	5.9	8.1
12	15.4	14	11.5	12.9	13.5	7.9	12.5	13.3	7.5	27.9	21.5	20.6	16.7	16.6	13.3	17.3	15.2	11.3	-5.1	-7.7	-6.5	-5.6	-7.9	-6.5	-11.9	-16.9	-15.9	-10.1	-11.3	-11	-10.8	-5.5	-8.8	-8.7	-5.1	-7.5	0.3	1.2	0.3	0.1	5.4	7.9	0.7	2.2	1.2	22	24.3	19.6	5.2
	LT	left side
	RT	right side
	K	angle
	S1,L5,L4,L3,L2,L1	number of vertebra
	B	frontal plane
	S	sagittal plane
	before,after	before/after ergonomic instruction
	_1,_2,_3	number of tial
	actII	activity II
[truncated: 23 more columns]

## Sheet: ROM activity II after
lp	max_KS1B_przes_po_1 [deg]	max_KS1B_przes_po_2 [deg]	max_KS1B_przes_po_3 [deg]	max_KL5B_przes_po_1 [deg]	max_KL5B_przes_po_2 [deg]	max_KL5B_przes_po_3 [deg]	max_KL4B_przes_po_1 [deg]	max_KL4B_przes_po_2 [deg]	max_KL4B_przes_po_3 [deg]	max_KL3B_przes_po_1 [deg]	max_KL3B_przes_po_2 [deg]	max_KL3B_przes_po_3 [deg]	max_KL2B_przes_po_1 [deg]	max_KL2B_przes_po_2 [deg]	max_KL2B_przes_po_3 [deg]	max_KL1B_przes_po_1 [deg]	max_KL1B_przes_po_2 [deg]	max_KL1B_przes_po_3 [deg]	min_KS1B_przes_po_1 [deg]	min_KS1B_przes_po_2 [deg]	min_KS1B_przes_po_3 [deg]	min_KL5B_przes_po_1 [deg]	min_KL5B_przes_po_2 [deg]	min_KL5B_przes_po_3 [deg]	min_KL4B_przes_po_1 [deg]	min_KL4B_przes_po_2 [deg]	min_KL4B_przes_po_3 [deg]	min_KL3B_przes_po_1 [deg]	min_KL3B_przes_po_2 [deg]	min_KL3B_przes_po_3 [deg]	min_KL2B_przes_po_1 [deg]	min_KL2B_przes_po_2 [deg]	min_KL2B_przes_po_3 [deg]	min_KL1B_przes_po_1 [deg]	min_KL1B_przes_po_2 [deg]	min_KL1B_przes_po_3 [deg]	max_KS1S_przes_po_1 [deg]	max_KS1S_przes_po_2 [deg]	max_KS1S_przes_po_3 [deg]	max_KL5S_przes_po_1 [deg]	max_KL5S_przes_po_2 [deg]	max_KL5S_przes_po_3 [deg]	max_KL4S_przes_po_1 [deg]	max_KL4S_przes_po_2 [deg]	max_KL4S_przes_po_3 [deg]	max_KL3S_przes_po_1 [deg]	max_KL3S_przes_po_2 [deg]	max_KL3S_przes_po_3 [deg]	max_KL2S_przes_po_1 [deg]
1	17.8	21.1	17.1	25.7	29.7	23.3	19.9	26.4	21	21.2	25.5	21.4	32.3	34.2	29.6	28.7	30.9	26.3	-4.9	-4.2	-7.8	-3.7	-3.2	-7.7	-7.5	-5.8	-12.7	-6.6	-8.1	-12.7	-10	-14.1	-16.4	-9.6	-14.1	-17.4	33.8	29.5	35.3	20.3	15.6	23.1	11.8	6	15.3	21.4	15.9	24.5	19.7
2	9.5	6.4	2.3	23.6	19.5	18.4	13.3	11	9.8	9.4	7.9	8.9	8.9	7.8	8.2	13.6	14	14.4	-37.6	-38.2	-38.7	0	0	0	0	-1.1	-6.6	-2.5	-3	-2.1	-2.5	-0.7	-3.5	-1.2	-0.2	-0.3	2.4	1.4	0.2	8.6	9.6	9.8	1.8	3.6	1.6	27	25.1	25.2	40.5
3	10.5	16.9	11.9	20.7	26	18	0	1.3	0	8	7.8	8.2	15.2	15.1	14.8	10.4	5.1	2.8	-1.1	0	-1.2	-0.3	0	-0.9	-21.5	-11.8	-20.8	-2.9	-2.4	-2.2	-0.7	0	-0.4	-5.1	-5.5	-11.6	2.3	1.2	2.3	4.6	3.4	4.6	1.9	1.6	3	2.7	2	4	2.3
4	15.7	17	15.4	24.9	22.9	23.8	29.9	28.7	28.5	28.1	25.5	25.9	33.3	30.1	31.2	35	32.5	33	-8.5	-9.5	-9.6	-12.1	-11.6	-12.6	-13.2	-13.6	-12.8	-13.3	-11.7	-14.5	-13.9	-12.9	-14.2	-12.1	-10.8	-12.9	8.5	9.3	7.6	5.2	6.7	8	2.4	3.1	2.6	25.2	21.8	19.4	36.1
5	3.8	4.8	4.9	4.8	3.8	3	2	2.4	3.3	6	6.6	9.5	6.5	6.3	7.6	3.9	3.3	2.8	-4.1	-5.2	-3	-8	-8.1	-7.3	-15.7	-17	-16.1	-2.8	-3.6	-1.5	-3.7	-4.4	-5.3	-11.6	-8.1	-11.2	2	2	2	2.4	2	1.7	1.5	1.7	0.9	0.3	5.2	3.4	24.3
7	11.5	12.4	16.5	16.8	17.8	23.3	7.1	6.7	9.8	8.8	11.3	14.1	8.2	10.1	16.7	17.6	18.7	24.4	-1.9	-0.4	-3	-1.9	-0.5	-2.6	-9.9	-9.9	-7.9	-3	-3.1	-3.6	-6	-5.9	-1.8	-1.4	-0.1	-0.3	1.5	0.7	3.8	3.1	2.3	8.4	10.6	8.8	9.9	2.8	2.1	4.8	2.1
8	7	9.8	15.7	5	8	9	11.9	10.6	16.7	12.8	14.2	19.9	11.2	16.2	22.1	11.5	12.6	21	-10.1	-11.3	-12.1	-11.3	-9.3	-10.2	-12.6	-20.8	-22.1	-15.4	-18	-18.4	-17.6	-18.1	-21.2	-19	-23.7	-23.8	27.9	24.4	24.4	5.5	1.2	4.4	1.2	1.4	2	14.4	8.4	9.5	33.7
9	15.9	18.6	16.6	11.2	15.5	14.7	25	30	25.8	30.9	35	31.7	33.3	36	32.5	41.8	43.8	40.2	-12	-9.3	-10.9	-10	-9.4	-7.2	-16.9	-13.3	-17.3	-18.7	-15.4	-16.8	-16.7	-14.2	-14.6	-19.8	-17.5	-18.8	6.8	4.5	6.7	13.3	11.3	13.7	8.4	7.7	7.9	7.5	6.7	8.8	9.5
10	10.3	7.9	9.7	14.4	9.6	9.1	28	23.6	26.2	27.2	25	26.9	27.5	25.5	26.9	32.4	28.7	31.8	-7.6	-8	-5.2	-12.8	-10.6	-7.6	-33.2	-30.4	-28.1	-18.3	-9.4	-10.3	-6.9	-0.1	-0.4	-4.4	-1.4	-0.7	1.4	0.7	2.4	3.7	1.4	6.3	16.1	15.5	19	33.7	31.9	36	29.1
11	8.9	2.2	0.2	14	4.4	2.3	15.1	2.5	3	23.3	10.1	4	29.8	19	3.7	26.5	15.5	4.5	-4.7	-8.9	-11.5	-6	-6.9	-14.4	-3.1	-6.5	-13	-7.4	-10	-14.2	-4.5	-1.6	-6.2	-6.4	-5	-11	0.7	0.2	0.2	2.3	3.5	2.7	2.2	1.3	1.5	29.5	19.4	15.4	30.6
12	14.7	18.5	20	17.2	15.6	14.1	16.6	13.5	12.6	22.6	27.6	19.9	17.4	18.3	15.5	18.7	15.2	13.4	-9	-9.9	-6.2	-8.4	-10	-4.7	-20.4	-17.3	-20.8	-6.3	-9.3	-13.5	-7.2	-8.4	-9.6	-6.4	-7.7	-11.1	11.2	15.1	14.1	6.4	13.1	6.7	4.9	4	5	29.3	30.1	33.1	6.8
	LT	left side
	RT	right side
	K	angle
	S1,L5,L4,L3,L2,L1	number of vertebra
	B	frontal plane
	S	sagittal plane
	before,after	before/after ergonomic instruction
	_1,_2,_3	number of tial
	actII	activity II
[truncated: 23 more columns]
